# Supplementary material for: Turning Meadow Weeds Into Valuable Species for the Romanian Ethnomedicine While Complying With the Environmentally Friendly Farming Requirements of the European Union’s Common Agricultural Policy
Source: PubMed Central journal article supplement (PMC7191034; doi:10.3389/fphar.2020.00529), 2020-04-23
Supplement: Image_1.pdf [file Image_1.pdf]

## Supplementary Figure 1

**Supplementary Figure 1.** The geographical distribution of the East European countries where details about the ethnomedicinal uses of the meadow weeds were reported (*green color*). The countries not included in the analysis are shaded gray.

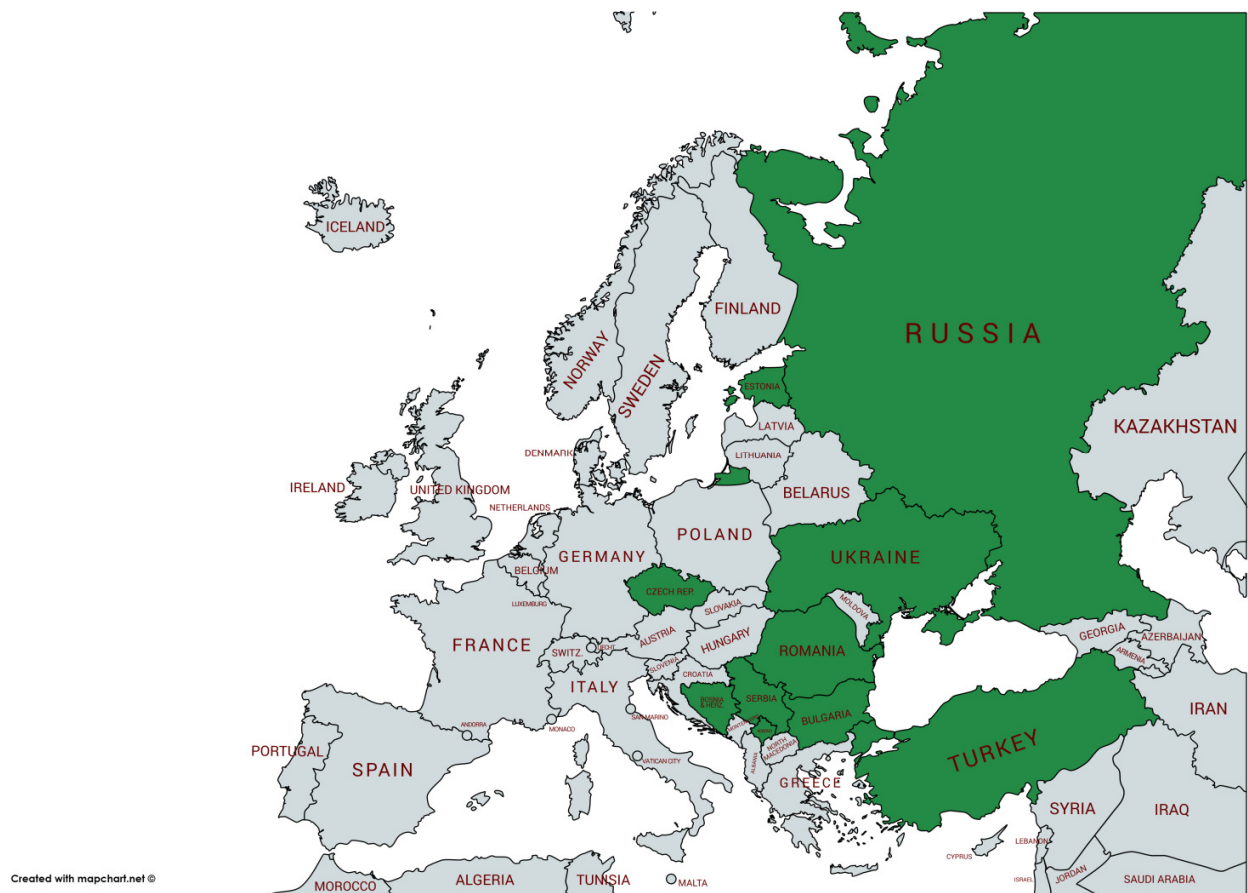

The map was created on [mapchart.net](https://www.mapchart.net)
