# Supplementary material for: Turning Meadow Weeds Into Valuable Species for the Romanian Ethnomedicine While Complying With the Environmentally Friendly Farming Requirements of the European Union’s Common Agricultural Policy
Source: PubMed Central journal article supplement (PMC7191034; doi:10.3389/fphar.2020.00529), 2020-04-23
Supplement: Table_1.pdf [file Table_1.pdf]

### Supplementary Table 1

**Supplementary Table 1.** Commercial herbal food supplements<sup>(\*)</sup> sold online on the Romanian market (links accessed: 05 March 2020)

| Species                 | Produced |          | Form/composition                        | Link                                                                                                                                                                                                                                                                                                                                    |
|-------------------------|----------|----------|-----------------------------------------|-----------------------------------------------------------------------------------------------------------------------------------------------------------------------------------------------------------------------------------------------------------------------------------------------------------------------------------------|
|                         | domestic | imported |                                         |                                                                                                                                                                                                                                                                                                                                         |
| <i>Arctium lappa</i> L. | X        |          | Hydroalcoholic extract (roots)          | <a href="https://www.charmecosmetics.ro/tinctura-de-brusture/">https://www.charmecosmetics.ro/tinctura-de-brusture/</a>                                                                                                                                                                                                                 |
|                         | X        |          | Tea (roots) (+ other 9 species)         | <a href="https://deprinromania.ro/ro/Ceai-Tiroido-G-20-plicuri">https://deprinromania.ro/ro/Ceai-Tiroido-G-20-plicuri</a>                                                                                                                                                                                                               |
|                         |          | X        | Capsules (roots)                        | <a href="https://ro.coral-club.com/shop/products/91860.html">https://ro.coral-club.com/shop/products/91860.html</a>                                                                                                                                                                                                                     |
|                         |          | X        | Capsules (roots) (+ other 4 species)    | <a href="https://www.cosmopharm.eu/produs/pachet-pentru-afectiuni-hepatice/">https://www.cosmopharm.eu/produs/pachet-pentru-afectiuni-hepatice/</a>                                                                                                                                                                                     |
|                         | X        |          | Hidroalcoolic extract roots)            | <a href="https://www.fanusplant.ro/tinctura-brusture.html">https://www.fanusplant.ro/tinctura-brusture.html</a>                                                                                                                                                                                                                         |
|                         | X        |          | Hidroalcoolic extract roots)            | <a href="https://picaturi-extracte.compari.ro/dacia-plant/tinctura-de-brusture-50ml-dacia-plant-p366789743/">https://picaturi-extracte.compari.ro/dacia-plant/tinctura-de-brusture-50ml-dacia-plant-p366789743/</a>                                                                                                                     |
|                         | X        |          | Tea                                     | <a href="https://stefmar-store.ro/ceai-brusture-radacina-50g">https://stefmar-store.ro/ceai-brusture-radacina-50g</a>                                                                                                                                                                                                                   |
|                         | X        |          | Hidroalcoolic extract (flowers)         | <a href="http://terrabucovina.ro/extract-brustur">http://terrabucovina.ro/extract-brustur</a>                                                                                                                                                                                                                                           |
|                         | X        |          | Capsules (+ other 7 plant species)      | <a href="http://www.hofigal.eu/depurin-40-compr-6.html">http://www.hofigal.eu/depurin-40-compr-6.html</a>                                                                                                                                                                                                                               |
|                         |          | X        | Capsules (roots, powder)                | <a href="https://www.pcfarm.ro/produs/8168/Burdock---Brusture--">https://www.pcfarm.ro/produs/8168/Burdock---Brusture--</a>                                                                                                                                                                                                             |
|                         | X        |          | Hidroalcoolic extract                   | <a href="https://www.pcfarm.ro/produs/7706/Tinctura-de-brusture---Dacia-Plant">https://www.pcfarm.ro/produs/7706/Tinctura-de-brusture---Dacia-Plant</a>                                                                                                                                                                                 |
|                         |          | X        | Powder (roots)                          | <a href="http://www.nutramax.ro/250-Produse-Gama-Nutra-Life-Pulberi-Bioactive-Simple/264~Protectie-Cardio-Vasculara/438-Burdock-Root---Pulbere-Bioactiva---125gr.html">http://www.nutramax.ro/250-Produse-Gama-Nutra-Life-Pulberi-Bioactive-Simple/264~Protectie-Cardio-Vasculara/438-Burdock-Root---Pulbere-Bioactiva---125gr.html</a> |
|                         |          | X        | Tea (roots) (+ other 7 plant species)   | <a href="https://www.cel.ro/ceai/ceai-din-8-plante-essiac-113gr-swanson-pMCI3MTMtNg-l/">https://www.cel.ro/ceai/ceai-din-8-plante-essiac-113gr-swanson-pMCI3MTMtNg-l/</a>                                                                                                                                                               |
|                         |          | X        | Liquid extract (+other 3 plant species) | <a href="https://www.remediu.ro/essiac-300ml-essiac-p756.html">https://www.remediu.ro/essiac-300ml-essiac-p756.html</a>                                                                                                                                                                                                                 |

|                              |   |   |                                                |                                                                                                                                                                                                                                         |
|------------------------------|---|---|------------------------------------------------|-----------------------------------------------------------------------------------------------------------------------------------------------------------------------------------------------------------------------------------------|
|                              | X |   | Tea (roots) (+ other 6 species)                | <a href="https://www.favisan.ro/catalog.php?detalii=157">https://www.favisan.ro/catalog.php?detalii=157</a>                                                                                                                             |
| <i>Carduus nutans</i> L.     |   | X | Tea (+ other 9 species)                        | <a href="https://bioboomb.ro/ceai-anti-alergii-bio-50-g/">https://bioboomb.ro/ceai-anti-alergii-bio-50-g/</a>                                                                                                                           |
|                              |   | X | Tea                                            | <a href="https://oliveland.ro/product/ceai-de-ciulin-60g/">https://oliveland.ro/product/ceai-de-ciulin-60g/</a>                                                                                                                         |
| <i>Conium maculatum</i> L.   |   | X | Homeopathic remedy                             | <a href="https://www.apoteca-farmacie.ro/conium-maculatum-ch15-1-tub-boiron--12795">https://www.apoteca-farmacie.ro/conium-maculatum-ch15-1-tub-boiron--12795</a>                                                                       |
| <i>Eryngium campestre</i> L. |   | X | Tea (+ other 12 plant species)                 | <a href="https://ctscorner.ro/infuzie-de-plante/216-ceai-pentru-afectiuni-erectile-50g-8594045067873.html">https://ctscorner.ro/infuzie-de-plante/216-ceai-pentru-afectiuni-erectile-50g-8594045067873.html</a>                         |
|                              | X |   | Syrup (aerial parts) (+ other 6 plant species) | <a href="https://www.abcplant.ro/remedii/tusiflor-sirop-200-ml.html">https://www.abcplant.ro/remedii/tusiflor-sirop-200-ml.html</a>                                                                                                     |
|                              | X |   | Syrup (aerial parts) (+ other 7 plant species) | <a href="https://www.pfarma.ro/medicatie-pe-afectiuni/afectiuni-respiratorii/elidor-sinomax-sirop-200-ml-a013109.html">https://www.pfarma.ro/medicatie-pe-afectiuni/afectiuni-respiratorii/elidor-sinomax-sirop-200-ml-a013109.html</a> |
| <i>Rumex acetosella</i> L.   |   | X | Leaf extract (+other 3 plant species)          | <a href="https://www.remediu.ro/essiac-300ml-essiac-p756.html">https://www.remediu.ro/essiac-300ml-essiac-p756.html</a>                                                                                                                 |
|                              | X |   | Tea (+other 31 plant species)                  | <a href="https://www.drgreen.ro/produse/ceaiuri/ceai-pansament-digestiv-320g.html">https://www.drgreen.ro/produse/ceaiuri/ceai-pansament-digestiv-320g.html</a>                                                                         |
|                              | X |   | Extract                                        | <a href="https://www.breslo.ro/item/extract-de-ulum-extract-de-pelin-extract-de-macris-extract-de-lamaita-687745">https://www.breslo.ro/item/extract-de-ulum-extract-de-pelin-extract-de-macris-extract-de-lamaita-687745</a>           |
|                              |   | X | Tea (leaves) (+ other 7 plant species)         | <a href="https://www.cel.ro/ceai/ceai-din-8-plante-essiac-113gr-swanson-pMCI3MTMtNg-l/">https://www.cel.ro/ceai/ceai-din-8-plante-essiac-113gr-swanson-pMCI3MTMtNg-l/</a>                                                               |
| <i>Veratrum album</i> L.     |   | X | Homeopathic product                            | <a href="https://www.argefarm.ro/homeopate/25932-Veratrum-Album-30ch.html">https://www.argefarm.ro/homeopate/25932-Veratrum-Album-30ch.html</a>                                                                                         |
| <i>Xanthium spinosum</i> L.  | X |   | Tea                                            | <a href="https://www.daciaplant.ro/ceai-ghimpe.html">https://www.daciaplant.ro/ceai-ghimpe.html</a>                                                                                                                                     |
|                              | X |   | Tea                                            | <a href="https://www.alevia.com.ro/product/ceai-de-ghimpe/">https://www.alevia.com.ro/product/ceai-de-ghimpe/</a>                                                                                                                       |
|                              | X |   | Tea                                            | <a href="https://deprinromania.ro/ro/Ceai-de-ghimpe-U87-20-plicuri">https://deprinromania.ro/ro/Ceai-de-ghimpe-U87-20-plicuri</a>                                                                                                       |
|                              | X |   | Tea                                            | <a href="https://pentrucorpultau.ro/produs/ceai-ghimpe/">https://pentrucorpultau.ro/produs/ceai-ghimpe/</a>                                                                                                                             |
|                              | X |   | Hidroalcoolic extract                          | <a href="https://comenzi.farmaciatei.ro/farmacie/urologie/prostata/tinctura-de-ghimpe-50-ml-dacia-plant-p305314">https://comenzi.farmaciatei.ro/farmacie/urologie/prostata/tinctura-de-ghimpe-50-ml-dacia-plant-p305314</a>             |
|                              | X |   | 70% hidroalcoolic extract                      | <a href="https://www.shopmania.ro/produse-naturiste-diverse/p-tinctura-de-ghimpe-hofigal-149215355">https://www.shopmania.ro/produse-naturiste-diverse/p-tinctura-de-ghimpe-hofigal-149215355</a>                                       |
|                              | X |   | Tea                                            | <a href="https://www.emag.ro/ceai-">https://www.emag.ro/ceai-</a>                                                                                                                                                                       |

|                               |   |   |                                                                                      |                                                                                                                                                                                                                                                                                                                                                                                                                 |
|-------------------------------|---|---|--------------------------------------------------------------------------------------|-----------------------------------------------------------------------------------------------------------------------------------------------------------------------------------------------------------------------------------------------------------------------------------------------------------------------------------------------------------------------------------------------------------------|
|                               |   |   |                                                                                      | <a href="http://www.farmanatpoi.ro/prostato-plant-ceai-prostata-100g-fmn00003/pd/DN23TDBBM/">farmanatpoi.ro/prostato-plant-ceai-prostata-100g-fmn00003/pd/DN23TDBBM/</a>                                                                                                                                                                                                                                        |
|                               | X |   | Tea                                                                                  | <a href="https://www.planteea.ro/ceai-ghimpe-50g-trident/">https://www.planteea.ro/ceai-ghimpe-50g-trident/</a>                                                                                                                                                                                                                                                                                                 |
|                               | X |   | Tea                                                                                  | <a href="https://stefmar-store.ro/ceai-ghimpe-iarba-50g">https://stefmar-store.ro/ceai-ghimpe-iarba-50g</a>                                                                                                                                                                                                                                                                                                     |
|                               | X |   | Capsule                                                                              | <a href="https://www.pcfarm.ro/produs/862/Ghimpe">https://www.pcfarm.ro/produs/862/Ghimpe</a>                                                                                                                                                                                                                                                                                                                   |
|                               | X |   | Capsule (+ other 5 plant species)                                                    | <a href="https://www.drgreen.ro/afectiuni/aparatul-urinar/prostatita/pufulita-cu-florimici-60cps-250mg-hypericum.html">https://www.drgreen.ro/afectiuni/aparatul-urinar/prostatita/pufulita-cu-florimici-60cps-250mg-hypericum.html</a>                                                                                                                                                                         |
|                               | X |   | Glyceric extract extract 1:10, in solutiehidroglicerica cu 50% v/v glicerinavegetala | <a href="https://www.minuneanaturii.ro/produse/prostata/extract-gliceric-ghimpe-50ml-ad-natura-pret-oferta_.html">https://www.minuneanaturii.ro/produse/prostata/extract-gliceric-ghimpe-50ml-ad-natura-pret-oferta_.html</a>                                                                                                                                                                                   |
|                               | X |   | Supozitoare                                                                          | <a href="http://www.elzinplant.ro/produs/Pentru%20afectiuni%20ale%20prostataei/carpizin-42">http://www.elzinplant.ro/produs/Pentru%20afectiuni%20ale%20prostataei/carpizin-42</a>                                                                                                                                                                                                                               |
|                               | X |   | Tea (+ other 6 plant species)                                                        | <a href="https://faunusplant.ro/produse/ceaiuri/ceai-retete-traditionale-prostata-180g/">https://faunusplant.ro/produse/ceaiuri/ceai-retete-traditionale-prostata-180g/</a>                                                                                                                                                                                                                                     |
| <i>Xanthium strumarium</i> L. | X |   | Fruit extract (+ other plant species)                                                | <a href="https://www.putereaplantelor.ro/adenom-de-prostata/comag-plant-b-supozitoare-elzin-plant.html?gclid=Cj0KCQjwuNbsBRC-ARIsAAzITucDN2VV51J6u05MUB3nhuZtoBbE5s-IoZGMz-ueOeIX7omiv81LQmUaApXWEALw_wcB">https://www.putereaplantelor.ro/adenom-de-prostata/comag-plant-b-supozitoare-elzin-plant.html?gclid=Cj0KCQjwuNbsBRC-ARIsAAzITucDN2VV51J6u05MUB3nhuZtoBbE5s-IoZGMz-ueOeIX7omiv81LQmUaApXWEALw_wcB</a> |
|                               |   | X | Fruit extract (+ other plant species)                                                | <a href="https://comenzi.farmaciatei.ro/ingrijire-personala/ingrijire-corp-si-fata/tratament-lotiune-calmanta-real-tonic-200-ml-atoclassic-p10056588">https://comenzi.farmaciatei.ro/ingrijire-personala/ingrijire-corp-si-fata/tratament-lotiune-calmanta-real-tonic-200-ml-atoclassic-p10056588</a>                                                                                                           |
|                               |   | X | Fruit extract (+ other plant species)                                                | <a href="https://comenzi.bebetei.ro/produse-dermatologice/ingrijire-fata/creme-si-produse-ingrijire/esenta-booster-geum-sul-first-100ml-missha-p349451">https://comenzi.bebetei.ro/produse-dermatologice/ingrijire-fata/creme-si-produse-ingrijire/esenta-booster-geum-sul-first-100ml-missha-p349451</a>                                                                                                       |
|                               | X |   | Fruit extract (+ other plant species)                                                | <a href="https://www.remediu.ro/conimed-plant-supozitor-15-gr-10buc-conimed-p15887.html?utm_source=price-ro">https://www.remediu.ro/conimed-plant-supozitor-15-gr-10buc-conimed-p15887.html?utm_source=price-ro</a>                                                                                                                                                                                             |

(\*)*Disclaimer:* Mention of proprietary products is solely for the purpose of providing specific information, and does not constitute an endorsement or a recommendation for their use.
